# Supplementary material
Source: PubMed Central journal article supplement (PMC125058)

# STDP curve

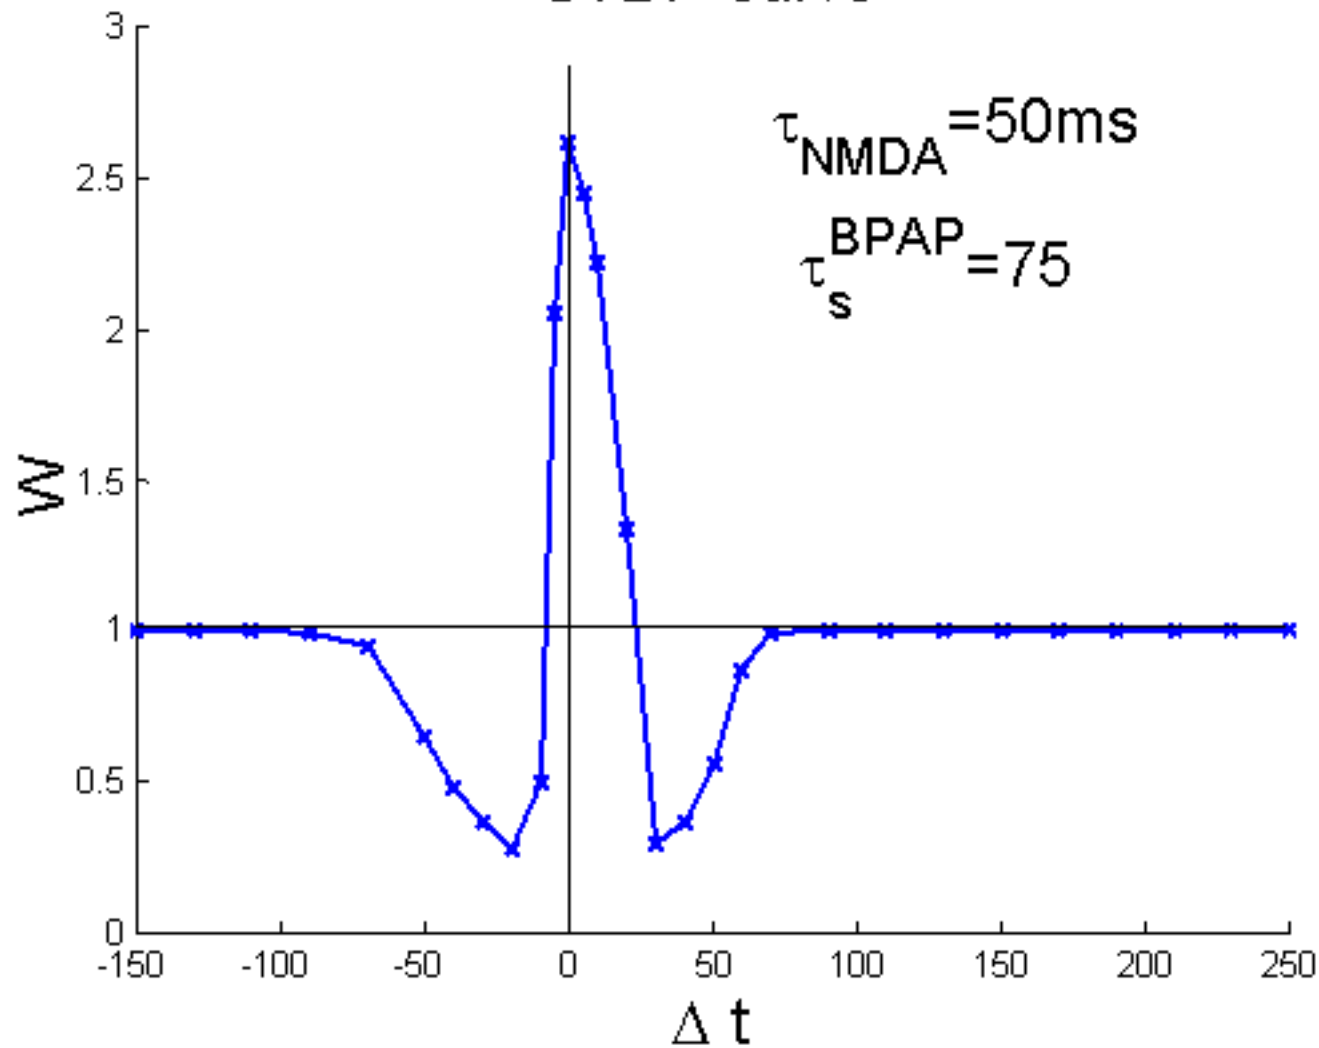

Supplement: pnas_152343099_10.pdf [file pnas_152343099_10.pdf]

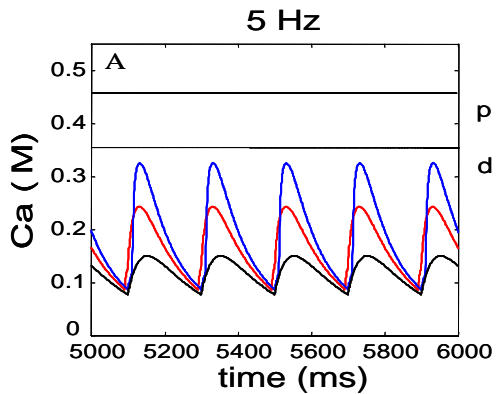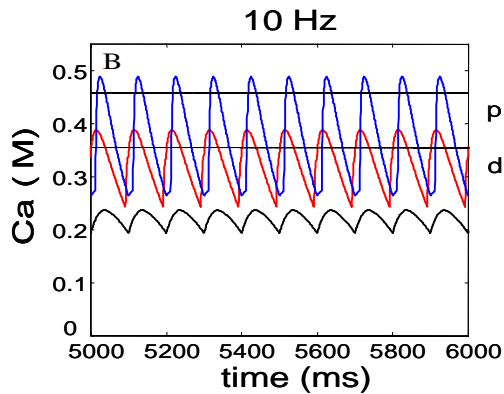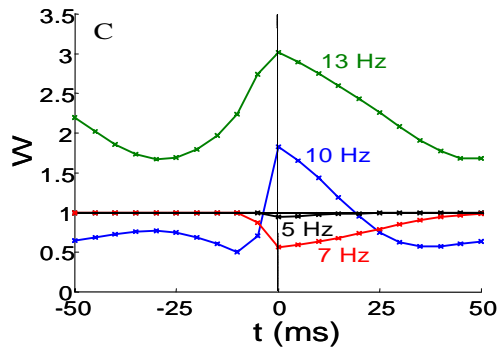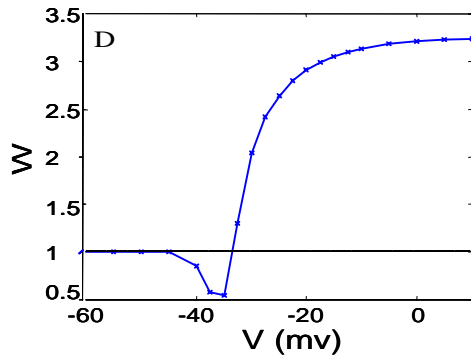

Supplement: pnas_152343099_11.pdf [file pnas_152343099_11.pdf]

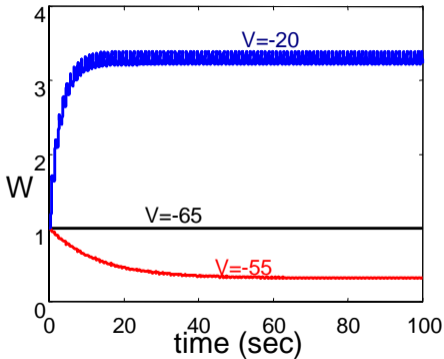

Supplement: pnas_152343099_7.pdf [file pnas_152343099_7.pdf]

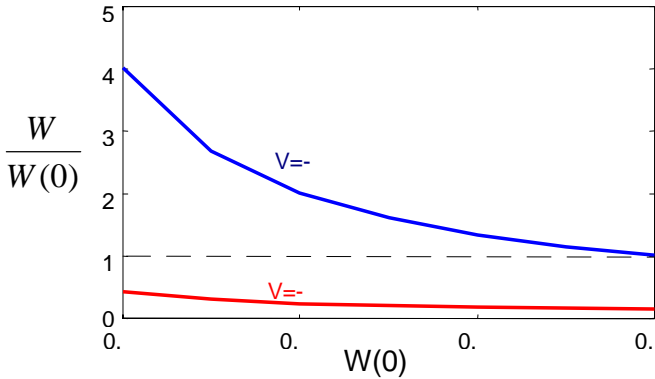

Supplement: pnas_152343099_8.pdf [file pnas_152343099_8.pdf]

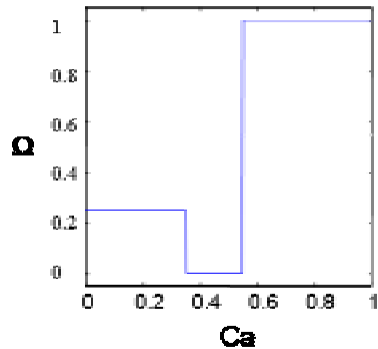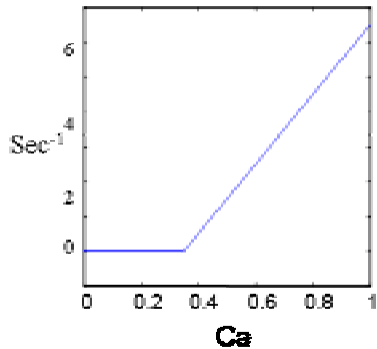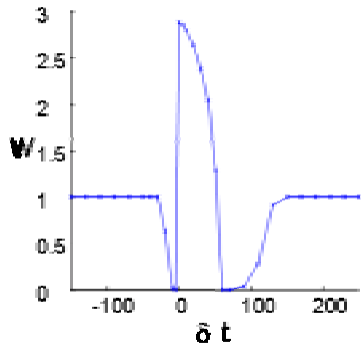

Supplement: pnas_152343099_9.pdf [file pnas_152343099_9.pdf]
